# Supplementary material for: Ultra-High-Performance Liquid Chromatography Quadrupole Time-of-Flight Mass Spectrometry for Simultaneous Pesticide Analysis and Method Validation in Sweet Pepper
Source: MDPI journal article supplement (doi:10.3390/molecules28145589), 2023-07-22
Supplement: s1 [file s1]

## *Supplementary Material*

# **Ultra-High-Performance Liquid Chromatography Quadrupole Time-of-Flight Mass Spectrometry for Simultaneous Pesticide Analysis and Method Validation in Sweet Pepper**

**Han Yeol Bang <sup>1,†</sup>, Yong-Kyoung Kim <sup>2,†</sup>, Hyoyoung Kim <sup>2</sup>, Eun Joo Baek <sup>2</sup>, Taewoong Na <sup>2</sup>, Kyu Sang Sim <sup>2</sup>  
and Ho Jin Kim <sup>2,\*</sup>**

<sup>1</sup> Gyeongnam Provincial Office, National Agricultural Products Quality Management Service, Busan 47537, Republic of Korea; bbangkkc@korea.kr

<sup>2</sup> Experiment Research Institute, National Agricultural Products Quality Management Service, Gimcheon-si 39660, Republic of Korea; ykkim79@korea.kr (Y.-K.K.); hyo02@korea.kr (H.K.); qrgh1004@naver.com (E.J.B.); naratw@korea.kr (T.N.); sim9612@naver.com (K.S.S.)

\* Correspondence: rex7878@korea.kr; Tel.: +82-54-429-7871

† These authors contributed equally to this work.

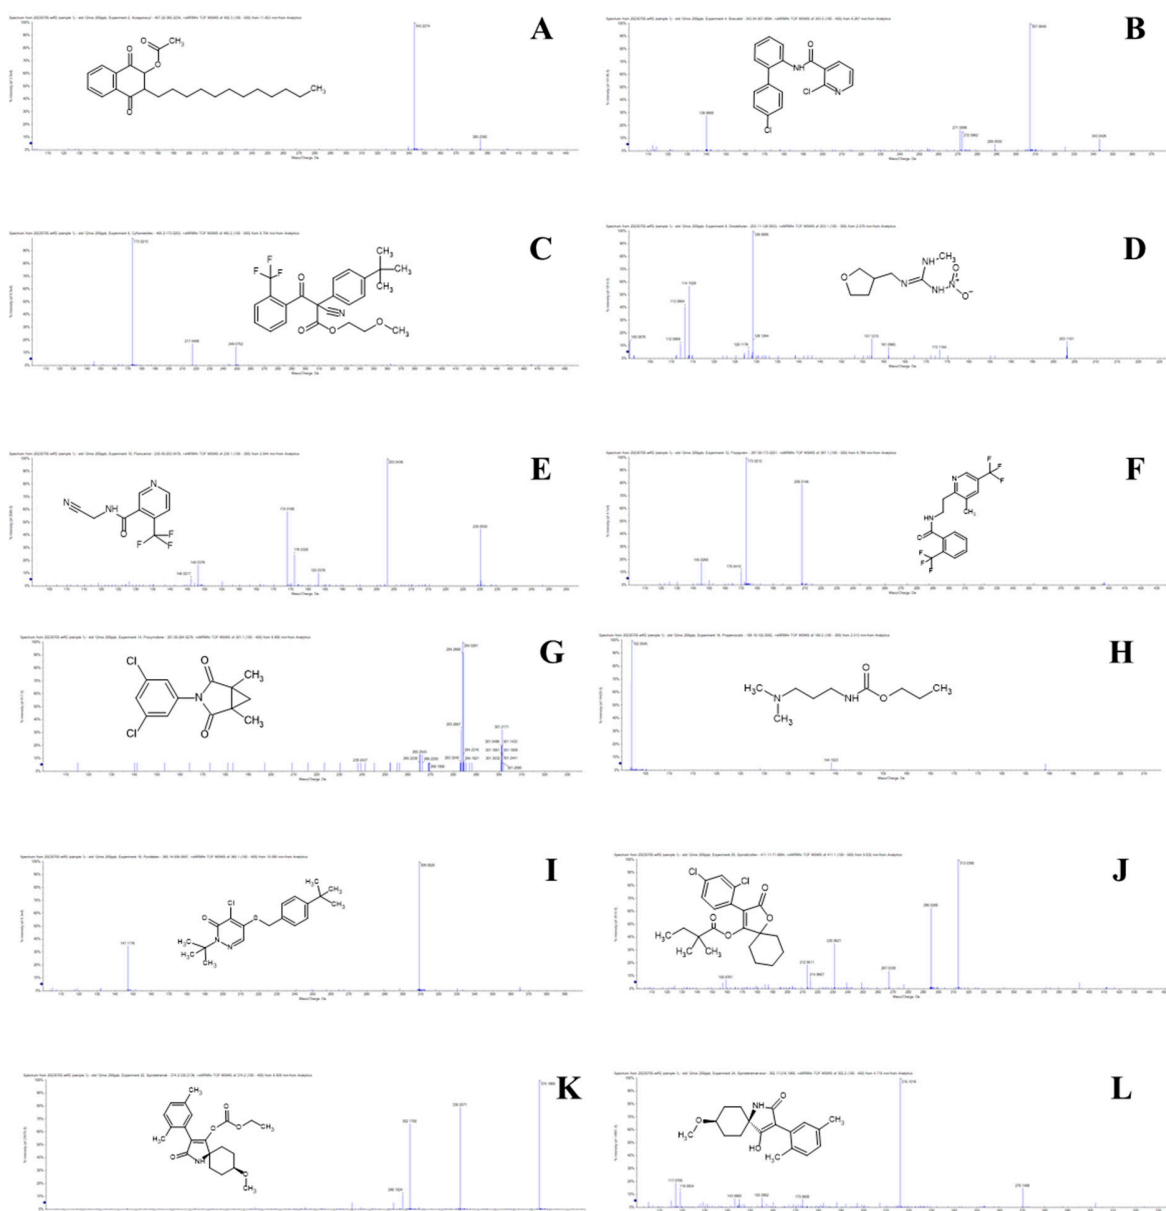

**Supplementary Figure S1.** Molecular structures and QTOF fragments of 12 pesticides. A) Acequinocyl, B) Boscalid, C) Cyflumetofen, D) Dinotefuran, E) Flonicamid, F) Fluopyram, G) Procymidone, H) Propamocarb, I) Pyridaben, J) Spirodiclofen, K) Spirotetramat, L) Spirotetramat-enol.

**Supplementary Table S1.** Parameters for the analysis of 140 pesticides by UHPLC-QTOF.

| No. | Compound                    | Retention time (min) | Precursor ion ( <i>m/z</i> ) | Fragment ion ( <i>m/z</i> ) | Declustering potential (eV) | Collision energy (eV) |
|-----|-----------------------------|----------------------|------------------------------|-----------------------------|-----------------------------|-----------------------|
| 1   | 2,3,5-Trimethacarb          | 5.26                 | 194.12                       | 107.05                      | 70                          | 55                    |
|     |                             |                      | 194.12                       | 137.10                      | 70                          | 10                    |
| 2   | 3,4,5-trimethacarb          | 5.32                 | 194.12                       | 137.10                      | 70                          | 10                    |
|     |                             |                      | 194.12                       | 122.07                      | 70                          | 35                    |
| 3   | 6-Benzyl aminopurine        | 3.67                 | 226.1                        | 65.042                      | 25                          | 70                    |
|     |                             |                      | 226.1                        | 91.05                       | 25                          | 35                    |
| 4   | Acequinocyl                 | 11.66                | 407.26                       | 343.23                      | 30                          | 13                    |
|     |                             |                      | 407.26                       | 385.24                      | 30                          | 7                     |
| 5   | Acibenzolar-S-methyl        | 5.96                 | 211                          | 136.01                      | 80                          | 35                    |
|     |                             |                      | 211                          | 68.98                       | 80                          | 75                    |
| 6   | Allethrin                   | 9.15                 | 303.2                        | 123.12                      | 105                         | 20                    |
|     |                             |                      | 303.2                        | 135.08                      | 105                         | 20                    |
| 7   | Ametoctradin                | 8.33                 | 276.22                       | 149.08                      | 110                         | 40                    |
|     |                             |                      | 276.22                       | 176.09                      | 110                         | 45                    |
| 8   | Asulam                      | 2.55                 | 231.04                       | 108.04                      | 95                          | 25                    |
|     |                             |                      | 231.04                       | 92.05                       | 95                          | 25                    |
| 9   | Azamethiphos                | 3.92                 | 324.98                       | 183.00                      | 70                          | 20                    |
|     |                             |                      | 324.98                       | 76.02                       | 70                          | 80                    |
| 10  | Benalaxyl                   | 7.65                 | 326.18                       | 294.15                      | 35                          | 15                    |
|     |                             |                      | 326.18                       | 91.05                       | 35                          | 45                    |
| 11  | Bensulide                   | 7.34                 | 398.07                       | 218.03                      | 105                         | 21                    |
|     |                             |                      | 398.07                       | 313.98                      | 105                         | 15                    |
| 12  | Boscalid                    | 6.21                 | 343.04                       | 307.06                      | 30                          | 29                    |
|     |                             |                      | 343.04                       | 271.09                      | 30                          | 43                    |
| 13  | Butocarboxim                | 3.55                 | 213.07                       | 156.04                      | 95                          | 15                    |
|     |                             |                      | 213.07                       | 75.02                       | 95                          | 19                    |
| 14  | Carbetamide                 | 3.84                 | 237.12                       | 118.09                      | 80                          | 15                    |
|     |                             |                      | 237.12                       | 120.04                      | 80                          | 23                    |
| 15  | Chlorantraniliprole         | 5.55                 | 483.98                       | 285.92                      | 40                          | 17                    |
|     |                             |                      | 483.98                       | 452.94                      | 40                          | 25                    |
| 16  | Chlorfenvinphos( <i>E</i> ) | 7.76                 | 358.98                       | 169.97                      | 110                         | 53                    |
|     |                             |                      | 358.98                       | 98.98                       | 110                         | 33                    |
| 17  | Chlorfenvinphos( <i>Z</i> ) | 7.76                 | 358.98                       | 155.05                      | 110                         | 15                    |
|     |                             |                      | 358.98                       | 204.94                      | 110                         | 27                    |

|    |                     |      |        |        |     |    |
|----|---------------------|------|--------|--------|-----|----|
| 18 | Chlorfluazuron      | 9.97 | 539.97 | 346.96 | 120 | 53 |
|    |                     |      | 539.97 | 382.94 | 120 | 27 |
| 19 | Chloridazone        | 3.22 | 222.04 | 65.04  | 20  | 49 |
|    |                     |      | 222.04 | 77.04  | 20  | 57 |
| 20 | Chlorobenzuron      | 7.51 | 309.02 | 156.02 | 30  | 21 |
|    |                     |      | 309.02 | 75.02  | 30  | 89 |
| 21 | Chlorotoluron       | 4.86 | 213.08 | 46.06  | 105 | 23 |
|    |                     |      | 213.08 | 72.04  | 105 | 39 |
| 22 | Chloroxuron         | 6.72 | 291.09 | 46.06  | 130 | 45 |
|    |                     |      | 291.09 | 72.04  | 130 | 50 |
| 23 | Clethodim sulfone   | 5.43 | 392.13 | 164.07 | 55  | 37 |
|    |                     |      | 392.13 | 208.14 | 55  | 27 |
| 24 | Clethodim sulfoxide | 5.52 | 376.13 | 164.07 | 95  | 23 |
|    |                     |      | 376.13 | 206.12 | 95  | 23 |
| 25 | Clomeprop           | 8.97 | 324.06 | 120.08 | 115 | 31 |
|    |                     |      | 324.06 | 203.00 | 115 | 19 |
| 26 | Crotoxyphos         | 6.23 | 332.1  | 211.03 | 46  | 15 |
|    |                     |      | 332.1  | 127.01 | 46  | 35 |
| 27 | Crufomate           | 7.31 | 292.09 | 108.02 | 165 | 31 |
|    |                     |      | 292.09 | 236.03 | 165 | 27 |
| 28 | Cyanazine           | 3.84 | 241    | 214.08 | 51  | 25 |
|    |                     |      | 241    | 104.00 | 51  | 43 |
| 29 | Cyantraniliprole    | 4.52 | 475    | 285.92 | 30  | 21 |
|    |                     |      | 475    | 177.00 | 30  | 56 |
| 30 | Cyazofamid          | 7.07 | 325    | 261.09 | 40  | 15 |
|    |                     |      | 325    | 108.01 | 40  | 22 |
| 31 | Cyclaniliprole      | 7.12 | 599.92 | 177.00 | 40  | 22 |
|    |                     |      | 599.92 | 283.92 | 40  | 73 |
| 32 | Cycloate            | 8.26 | 216.14 | 83.08  | 45  | 22 |
|    |                     |      | 216.14 | 63.02  | 45  | 45 |
| 33 | Cycloprothrin       | 9.81 | 499.12 | 455.08 | 75  | 17 |
|    |                     |      | 499.12 | 257.02 | 75  | 20 |
| 34 | Cyenopyrafen        | 9.81 | 394.25 | 254.13 | 30  | 39 |
|    |                     |      | 394.25 | 310.19 | 30  | 33 |
| 35 | Cyflumetofen        | 8.71 | 465.2  | 173.02 | 75  | 25 |
|    |                     |      | 465.2  | 249.07 | 75  | 17 |
| 36 | Demeton-S           | 5.73 | 259.06 | 61.01  | 30  | 55 |
|    |                     |      | 259.06 | 89.04  | 30  | 17 |

|    |                          |      |        |        |     |     |
|----|--------------------------|------|--------|--------|-----|-----|
| 37 | Demeton-S-methyl-sulfone | 3.28 | 263    | 169.00 | 55  | 21  |
|    |                          |      | 263    | 109.00 | 55  | 31  |
| 38 | Demeton-S-sulfone        | 3.27 | 291.05 | 234.99 | 115 | 21  |
|    |                          |      | 291.05 | 263.02 | 115 | 17  |
| 39 | Demeton-S-sulfoxide      | 3.19 | 275.05 | 140.98 | 25  | 23  |
|    |                          |      | 275.05 | 80.97  | 25  | 55  |
| 40 | Diclosulam               | 4.58 | 405.99 | 160.98 | 130 | 31  |
|    |                          |      | 405.99 | 377.97 | 130 | 21  |
| 41 | Dimethoate               | 3.19 | 230.01 | 124.98 | 40  | 25  |
|    |                          |      | 230.01 | 170.97 | 40  | 19  |
| 42 | Dinotefuran              | 2.59 | 203.11 | 129.09 | 125 | 15  |
|    |                          |      | 203.11 | 157.12 | 125 | 9   |
| 43 | Disulfoton               | 8.08 | 275    | 89.04  | 51  | 25  |
|    |                          |      | 275    | 61.01  | 51  | 43  |
| 44 | Disulfoton sulfone       | 4.94 | 307.03 | 124.98 | 105 | 23  |
|    |                          |      | 307.03 | 96.95  | 105 | 31  |
| 45 | Disulfoton sulfoxide     | 4.82 | 291    | 185    | 39  | 19  |
|    |                          |      | 291    | 129    | 39  | 41  |
| 46 | Dodine                   | 8.15 | 228.24 | 43.05  | 45  | 37  |
|    |                          |      | 228.24 | 57.07  | 45  | 31  |
| 47 | Enamectin B1a            | 9.36 | 886.53 | 158.11 | 150 | 53  |
|    |                          |      | 886.53 | 82.06  | 150 | 105 |
| 48 | Fensulfothion            | 5.17 | 309.04 | 234.97 | 135 | 27  |
|    |                          |      | 309.04 | 252.98 | 135 | 23  |
| 49 | Flonicamid               | 2.82 | 230.05 | 203.04 | 90  | 23  |
|    |                          |      | 230.05 | 148.04 | 90  | 37  |
| 50 | Fluometuron              | 4.74 | 233.09 | 46.06  | 130 | 31  |
|    |                          |      | 233.09 | 72.04  | 130 | 39  |
| 51 | Fluopyram                | 6.72 | 397.05 | 173.02 | 35  | 35  |
|    |                          |      | 397.05 | 208.01 | 35  | 27  |
| 52 | Flupyradifurone          | 3.14 | 289.06 | 126.01 | 106 | 30  |
|    |                          |      | 289.06 | 72.98  | 106 | 95  |
| 53 | Fluridone                | 5.65 | 330.11 | 259.10 | 150 | 63  |
|    |                          |      | 330.11 | 309.10 | 150 | 47  |
| 54 | Fluthiacet-methyl        | 7.45 | 404.03 | 274.00 | 125 | 41  |
|    |                          |      | 404.03 | 344.01 | 125 | 33  |
| 55 | Flutriafol               | 5.03 | 302.11 | 70.04  | 30  | 21  |
|    |                          |      | 302.11 | 75.02  | 30  | 93  |

|    |                             |      |        |        |     |     |
|----|-----------------------------|------|--------|--------|-----|-----|
| 56 | Fluxametamide               | 9.55 | 474.06 | 160.04 | 20  | 51  |
|    |                             |      | 474.06 | 400.01 | 20  | 25  |
| 57 | Imibenconazole              | 9.22 | 411    | 125.01 | 50  | 35  |
|    |                             |      | 411    | 89.04  | 50  | 111 |
| 58 | Indaziflam                  | 7.00 | 302.18 | 138.08 | 95  | 31  |
|    |                             |      | 302.18 | 145.10 | 95  | 29  |
| 59 | Ipfencarbazone              | 7.57 | 427.05 | 198.07 | 120 | 17  |
|    |                             |      | 427.05 | 43.05  | 120 | 43  |
| 60 | Isoproturon                 | 5.16 | 207.15 | 165.10 | 115 | 19  |
|    |                             |      | 207.15 | 46.06  | 115 | 29  |
| 61 | Isoxaben                    | 6.32 | 333.18 | 107.01 | 120 | 89  |
|    |                             |      | 333.18 | 165.05 | 120 | 29  |
| 62 | Isoxathion                  | 7.91 | 314.06 | 105.03 | 115 | 21  |
|    |                             |      | 314.06 | 286.03 | 115 | 13  |
| 63 | Lenacil                     | 5.08 | 235.14 | 136.04 | 30  | 41  |
|    |                             |      | 235.14 | 153.07 | 30  | 19  |
| 64 | Malaoxon                    | 4.14 | 315.07 | 127.04 | 105 | 13  |
|    |                             |      | 315.07 | 99.01  | 105 | 35  |
| 65 | Mandestrobin                | 7.66 | 314.18 | 119.05 | 55  | 35  |
|    |                             |      | 314.18 | 192.10 | 55  | 15  |
| 66 | Mefentrifluconazole         | 7.87 | 398.09 | 43.03  | 35  | 147 |
|    |                             |      | 398.09 | 70.04  | 35  | 39  |
| 67 | Mephosfolan                 | 3.98 | 270.04 | 139.96 | 25  | 35  |
|    |                             |      | 270.04 | 196.02 | 25  | 17  |
| 68 | Metaflumizone( <i>E</i> )   | 9.10 | 507.12 | 178.04 | 70  | 35  |
|    |                             |      | 507.12 | 287.08 | 70  | 35  |
| 69 | Metamitron                  | 3.16 | 203.09 | 104.05 | 100 | 29  |
|    |                             |      | 203.09 | 175.10 | 100 | 21  |
| 70 | Metominostrobin( <i>E</i> ) | 5.41 | 285.12 | 194.06 | 30  | 25  |
|    |                             |      | 285.12 | 196.08 | 30  | 21  |
| 71 | Neburon                     | 7.35 | 275.07 | 57.07  | 120 | 27  |
|    |                             |      | 275.07 | 88.11  | 120 | 21  |
| 72 | Nitenpyram                  | 2.69 | 271.1  | 126.01 | 35  | 35  |
|    |                             |      | 271.1  | 56.05  | 35  | 35  |
| 73 | Norea                       | 6.05 | 223.18 | 135.12 | 100 | 25  |
|    |                             |      | 223.18 | 67.05  | 100 | 39  |
| 74 | Norflurazon                 | 5.33 | 304.05 | 160.04 | 135 | 37  |
|    |                             |      | 304.05 | 284.04 | 135 | 31  |

|    |                        |       |        |        |     |    |
|----|------------------------|-------|--------|--------|-----|----|
| 75 | Orthosulfamuron        | 5.10  | 425.12 | 199.08 | 120 | 15 |
|    |                        |       | 425.12 | 227.05 | 120 | 21 |
| 76 | Orysastrobin           | 6.40  | 392.19 | 116.05 | 55  | 33 |
|    |                        |       | 392.19 | 205.10 | 55  | 17 |
| 77 | Oxadiargyl             | 7.92  | 341.05 | 151.02 | 71  | 33 |
|    |                        |       | 341.05 | 222.00 | 71  | 31 |
| 78 | Oxamyl oxime           | 2.78  | 163.05 | 44.98  | 55  | 47 |
|    |                        |       | 163.05 | 46.99  | 55  | 41 |
| 79 | Oxathiapiprolin        | 6.35  | 540.15 | 500.14 | 195 | 37 |
|    |                        |       | 540.15 | 522.14 | 195 | 33 |
| 80 | Oxycarboxin            | 3.32  | 268.06 | 175.00 | 40  | 23 |
|    |                        |       | 268.06 | 43.01  | 40  | 55 |
| 81 | Oxydemeton-methyl      | 2.72  | 247.02 | 105.04 | 35  | 15 |
|    |                        |       | 247.02 | 109.00 | 35  | 33 |
| 82 | Pebulate               | 8.15  | 204.14 | 128.11 | 55  | 15 |
|    |                        |       | 204.14 | 41.04  | 55  | 43 |
| 83 | Phenmedipham           | 5.56  | 301.12 | 136.04 | 120 | 31 |
|    |                        |       | 301.12 | 65.04  | 120 | 73 |
| 84 | Phenothrin             | 10.52 | 351.2  | 249.13 | 110 | 17 |
|    |                        |       | 351.2  | 305.19 | 110 | 15 |
| 85 | Phorate                | 7.93  | 261.02 | 46.99  | 30  | 43 |
|    |                        |       | 261.02 | 75.02  | 30  | 15 |
| 86 | Phorate oxon           | 5.47  | 245.04 | 46.99  | 55  | 43 |
|    |                        |       | 245.04 | 75.02  | 55  | 23 |
| 87 | Phorate oxon sulfone   | 3.28  | 277.03 | 183.03 | 115 | 15 |
|    |                        |       | 277.03 | 80.97  | 115 | 77 |
| 88 | Phorate oxon sulfoxide | 3.14  | 261.04 | 110.97 | 90  | 27 |
|    |                        |       | 261.04 | 243.03 | 90  | 11 |
| 89 | Phorate sulfone        | 4.98  | 293.01 | 247.03 | 110 | 9  |
|    |                        |       | 293.01 | 96.95  | 110 | 49 |
| 90 | Phorate sulfoxide      | 4.80  | 277.02 | 142.94 | 90  | 27 |
|    |                        |       | 277.02 | 170.97 | 90  | 17 |
| 91 | Phosfolan              | 3.51  | 256.02 | 139.96 | 80  | 29 |
|    |                        |       | 256.02 | 227.99 | 80  | 19 |
| 92 | Picarbutrazox          | 7.21  | 410.19 | 107.06 | 80  | 37 |
|    |                        |       | 410.19 | 310.14 | 80  | 19 |
| 93 | Picolinafen            | 9.05  | 377.09 | 238.05 | 55  | 31 |
|    |                        |       | 377.09 | 359.09 | 55  | 27 |

|     |                      |       |        |        |     |     |
|-----|----------------------|-------|--------|--------|-----|-----|
| 94  | Procymidone          | 6.85  | 301.05 | 284.02 | 30  | 10  |
|     |                      |       | 303.05 | 286.02 | 25  | 15  |
| 95  | Propamocarb          | 2.55  | 189.16 | 102.05 | 30  | 25  |
|     |                      |       | 189.16 | 74.02  | 30  | 33  |
| 96  | Propyrisulfuron      | 6.41  | 456.09 | 196.07 | 145 | 21  |
|     |                      |       | 456.09 | 261.03 | 145 | 21  |
| 97  | Proquinazid          | 9.90  | 373.04 | 271.92 | 25  | 45  |
|     |                      |       | 373.04 | 288.95 | 25  | 31  |
| 98  | Prosulfocarb         | 8.60  | 252.14 | 65.04  | 85  | 79  |
|     |                      |       | 252.14 | 91.05  | 85  | 39  |
| 99  | Pydiflumetofen       | 8.25  | 426.03 | 192.94 | 160 | 49  |
|     |                      |       | 426.03 | 406.03 | 160 | 19  |
| 100 | Pyflubumide          | 9.32  | 536.23 | 111.09 | 160 | 79  |
|     |                      |       | 536.23 | 155.08 | 160 | 33  |
| 101 | Pyflubumide-NH       | 8.92  | 466.19 | 137.07 | 205 | 51  |
|     |                      |       | 466.19 | 382.18 | 205 | 45  |
| 102 | Pyraclo nil          | 4.77  | 315.11 | 241.12 | 125 | 29  |
|     |                      |       | 315.11 | 276.09 | 125 | 21  |
| 103 | Pyraclostrobin       | 7.87  | 388.11 | 104.05 | 40  | 75  |
|     |                      |       | 388.11 | 163.06 | 40  | 37  |
| 104 | Pyraziflumid         | 6.82  | 380.08 | 147.02 | 150 | 41  |
|     |                      |       | 380.08 | 362.08 | 150 | 21  |
| 105 | Pyrazosulfuron-ethyl | 6.67  | 415.1  | 182.06 | 25  | 31  |
|     |                      |       | 415.1  | 83.02  | 25  | 67  |
| 106 | Pyrazoxyfen          | 7.62  | 403.06 | 65.04  | 95  | 109 |
|     |                      |       | 403.06 | 91.05  | 95  | 51  |
| 107 | Pyridaben            | 10.07 | 365.14 | 309.08 | 90  | 19  |
|     |                      |       | 365.14 | 147.12 | 90  | 35  |
| 108 | Pyrio fenone         | 8.11  | 366.11 | 184.01 | 55  | 29  |
|     |                      |       | 366.11 | 209.08 | 55  | 35  |
| 109 | Secbumeton           | 4.94  | 226.17 | 100.05 | 75  | 39  |
|     |                      |       | 226.17 | 170.10 | 75  | 23  |
| 110 | Sedaxane             | 6.64  | 332.16 | 159.03 | 80  | 23  |
|     |                      |       | 332.16 | 292.14 | 80  | 21  |
| 111 | Sethoxydim           | 8.88  | 328.19 | 178.09 | 75  | 27  |
|     |                      |       | 328.19 | 282.15 | 75  | 17  |
| 112 | Simazine             | 4.15  | 202.09 | 132.03 | 110 | 23  |
|     |                      |       | 202.09 | 68.02  | 110 | 45  |



|     |                         |      |        |          |     |    |
|-----|-------------------------|------|--------|----------|-----|----|
| 113 | Spinosyn A              | 8.07 | 732.47 | 142.12   | 35  | 51 |
|     |                         |      | 732.47 | 98.09    | 35  | 91 |
| 114 | Spinosyn D              | 8.56 | 746.48 | 142.12   | 45  | 39 |
|     |                         |      | 746.48 | 98.09    | 45  | 69 |
| 115 | Spirodiclofen           | 9.81 | 411.11 | 313.03   | 115 | 31 |
|     |                         |      | 411.11 | 230.96   | 115 | 15 |
| 116 | Spirotetramat           | 6.76 | 374.2  | 330.21   | 40  | 17 |
|     |                         |      | 374.2  | 302.18   | 40  | 23 |
| 117 | Spirotetramat-enol      | 4.68 | 302.17 | 216.10   | 125 | 37 |
|     |                         |      | 302.17 | 270.15   | 125 | 27 |
| 118 | Sulfentrazone           | 4.33 | 404.02 | 307.00   | 50  | 35 |
|     |                         |      | 404.02 | 386.99   | 50  | 21 |
| 119 | Sulprofos               | 9.46 | 323.04 | 218.9749 | 100 | 21 |
|     |                         |      | 323.04 | 247.0066 | 100 | 15 |
| 120 | Tebufloquin             | 7.52 | 290.16 | 192.08   | 35  | 43 |
|     |                         |      | 290.16 | 248.15   | 35  | 23 |
| 121 | Tebufloquin M1          | 5.86 | 248.14 | 192.08   | 160 | 33 |
|     |                         |      | 248.14 | 232.11   | 160 | 49 |
| 122 | Tebuthiuron             | 4.28 | 229.11 | 116.03   | 30  | 35 |
|     |                         |      | 229.11 | 172.09   | 30  | 23 |
| 123 | Tepraloxydim            | 6.71 | 342.15 | 166.09   | 55  | 25 |
|     |                         |      | 342.15 | 250.15   | 55  | 17 |
| 124 | Terbufos                | 8.93 | 289.05 | 103.06   | 35  | 11 |
|     |                         |      | 289.05 | 57.07    | 35  | 29 |
| 125 | Terbufos oxon           | 6.78 | 273.07 | 103.06   | 80  | 13 |
|     |                         |      | 273.07 | 57.07    | 80  | 31 |
| 126 | Terbufos oxon sulfone   | 3.75 | 305.06 | 202.96   | 115 | 23 |
|     |                         |      | 305.06 | 249.00   | 115 | 13 |
| 127 | Terbufos oxon sulfoxide | 3.57 | 289.07 | 142.99   | 80  | 27 |
|     |                         |      | 289.07 | 171.02   | 80  | 17 |
| 128 | Terbufos sulfone        | 5.85 | 321.04 | 114.96   | 110 | 27 |
|     |                         |      | 321.04 | 96.95    | 110 | 53 |
| 129 | Terbufos sulfoxide      | 5.85 | 305.05 | 187.00   | 25  | 13 |
|     |                         |      | 305.05 | 96.95    | 25  | 43 |
| 130 | Tolfenpyrad             | 9.11 | 384.15 | 154.08   | 30  | 59 |
|     |                         |      | 384.15 | 197.10   | 30  | 35 |
| 131 | Triafamone              | 4.22 | 407.06 | 160.09   | 150 | 57 |
|     |                         |      | 407.06 | 245.11   | 150 | 43 |

|     |                  |       |        |        |     |    |
|-----|------------------|-------|--------|--------|-----|----|
| 132 | Triazamate       | 6.77  | 315.15 | 226.10 | 60  | 15 |
|     |                  |       | 315.15 | 72.04  | 60  | 43 |
| 133 | Tribufos         | 10.10 | 315.1  | 168.99 | 100 | 21 |
|     |                  |       | 315.1  | 57.07  | 100 | 31 |
| 134 | Tricyclazole     | 3.46  | 190.04 | 136.02 | 115 | 37 |
|     |                  |       | 190.04 | 65.04  | 115 | 63 |
| 135 | Trifloxysulfuron | 4.98  | 438.07 | 182.06 | 120 | 23 |
|     |                  |       | 438.07 | 83.02  | 120 | 63 |
| 136 | Triticonazole    | 6.92  | 318.14 | 43.03  | 45  | 99 |
|     |                  |       | 318.14 | 70.04  | 45  | 27 |
| 137 | TZ-1E            | 7.06  | 410.19 | 107.06 | 40  | 35 |
|     |                  |       | 410.19 | 310.14 | 40  | 19 |
| 138 | Valifenalate     | 6.63  | 399.17 | 116.07 | 65  | 25 |
|     |                  |       | 399.17 | 155.03 | 65  | 37 |
| 139 | Vernolate        | 8.16  | 204.14 | 128.11 | 51  | 15 |
|     |                  |       | 204.14 | 43.05  | 51  | 21 |
| 140 | XMC              | 4.72  | 180.1  | 123.08 | 100 | 21 |
|     |                  |       | 180.1  | 51.02  | 100 | 79 |

---
